# Supplementary material for: Not one but three species of the naked mole-rat, a new biomedical model
Source: Research Square preprint supplement (doi:10.21203/rs.3.rs-5587985/v1), 2024-12-25
Supplement: Supplementary file 1 [file 6f845606eb8df3b693c697f5.xlsx]

## Sheet: Supplementary Table 1
ID	Genus	Species	Country	Locality	Latitude	Longitude	Altitude	Sex	Date	Source of data	CYTB	Reference	ddRAD dataset	Divergence dating	RAG	FGB	DHCR	SMO	TRPV
ETH1080	Heterocephalus	ansorgei	Ethiopia	Geralle NP	4.40888	39.4658	1018	F	2014-03-26	USB (R. Šumbera)	xx	this study	yes
ETH1081	Heterocephalus	ansorgei	Ethiopia	Geralle NP	4.40888	39.4658	1018	F	2014-03-26	USB (R. Šumbera)	xx	this study	yes	yes	OK506478	OK506561	OK524004	OK524084	OK524147
Kenya4962	Heterocephalus	ansorgei	Kenya	Meru NP	0.163392	38.2122	585	NA		J. Jarvis, S. Braude	xx	this study	yes
Kenya6164	Heterocephalus	ansorgei	Kenya	Meru NP	0.155744	38.2243	573	NA		J. Jarvis, S. Braude	xx	this study	yes
Kenya9120	Heterocephalus	ansorgei	Kenya	Meru NP	0.173978	38.2112	595	NA		J. Jarvis, S. Braude	xx	this study	yes
JJ72	Heterocephalus	ansorgei	Kenya	Mtito Andei	-2.6926	38.1668	757	F		J. Jarvis, G. Montoya-Sanhueza	xx	this study	yes
JJ79	Heterocephalus	ansorgei	Kenya	Mtito Andei	-2.6926	38.1668	757	F		J. Jarvis, G. Montoya-Sanhueza	xx	this study	yes
JJ81	Heterocephalus	ansorgei	Kenya	Mtito Andei	-2.6926	38.1668	757	M		J. Jarvis, G. Montoya-Sanhueza	xx	this study	yes
SOM344	Heterocephalus	glaber	Somalia	Habas	10.4113	42.8152	850	NA	2021-07-18	CU (D. Frynta)	xx	this study	yes
SOM345	Heterocephalus	glaber	Somalia	Habas	10.4113	42.8152	850	NA	2021-07-18	CU (D. Frynta)	xx	this study	yes
SOM369	Heterocephalus	glaber	Somalia	Xeego	10.2404	43.0515	1000	F	2021-07-22	CU (D. Frynta)	xx	this study	yes	yes	x	x	x	x	x
SOM406	Heterocephalus	glaber	Somalia	Agabar	9.93299	43.9048	900	F	2021-07-25	CU (D. Frynta)	xx	this study	yes
SOM416	Heterocephalus	glaber	Somalia	Boorama Amound University	9.94694	43.2231	1394	NA	2021-07-27	CU (D. Frynta)	xx	this study	yes
SOM512	Heterocephalus	phillipsi	Somaliland	Shanshacade	8.66035	45.9569	800	M	2022-06-11	CU (D. Frynta)	xx	this study	yes
SOM558	Heterocephalus	phillipsi	Somaliland	Xangay	8.94737	45.5263	900	F	2022-06-12	CU (D. Frynta)	xx	this study	yes	yes	x	x	x	x	x
SOM584	Heterocephalus	glaber	Somaliland	Sheikh	9.94133	45.1813	1430	F	2022-06-18	CU (D. Frynta)	xx	this study	yes
SOM585	Heterocephalus	glaber	Somaliland	Sheikh	9.94133	45.1813	1430	M	2022-06-18	CU (D. Frynta)	xx	this study	yes
Djibouti133	Heterocephalus	glaber	Djibouti	Assamo	10.9892	42.8373	711	F		LU (M. Zöttl)			yes
Djibouti131	Heterocephalus	glaber	Djibouti	Assamo	10.9892	42.8373	711	F		LU (M. Zöttl)	xx	this study	yes
Djibouti082	Heterocephalus	glaber	Djibouti	Assamo	10.9892	42.8373	711	M		LU (M. Zöttl)			yes
LAV2953	Heterocephalus	ansorgei	Ethiopia	Borena National Park	4.566	38.315	1603	F	2016-03-11	SIEE (L. Lavrenchenko)	MK795871	Zemlemerova et al. 2020a	yes
LAV2984	Heterocephalus	ansorgei	Ethiopia	Borena National Park	4.548	38.277	1649	F	2016-03-14	SIEE (L. Lavrenchenko)	MK795875	Zemlemerova et al. 2020a	yes
LAV3036	Heterocephalus	ansorgei	Ethiopia	Borena National Park	4.532	38.278	1653	M	2016-03-16	SIEE (L. Lavrenchenko)	MK795880	Zemlemerova et al. 2020a	yes
LAV3119	Heterocephalus	ansorgei	Ethiopia	Arero Forest	4.819	38.819	1642	F	2017-05-09	SIEE (L. Lavrenchenko)	MK795887	Zemlemerova et al. 2020a	yes
LAV3120	Heterocephalus	ansorgei	Ethiopia	Arero Forest	4.82	38.818	1635	F	2017-05-09	SIEE (L. Lavrenchenko)	MK795888	Zemlemerova et al. 2020a	yes
LAV3123	Heterocephalus	ansorgei	Ethiopia	Arero Forest	4.815	38.817	1646	M	2017-05-09	SIEE (L. Lavrenchenko)	MK795884	Zemlemerova et al. 2020a	yes
LAV3193	Heterocephalus	ansorgei	Ethiopia	Borena NP-Megady block	3.804	38.099	799	F	2017-05-20	SIEE (L. Lavrenchenko)	MK795885	Zemlemerova et al. 2020a	yes
LAV3207	Heterocephalus	ansorgei	Ethiopia	Borena NP-Megady block	3.781	38.067	813	M	2017-05-21	SIEE (L. Lavrenchenko)	MK795893	Zemlemerova et al. 2020a	yes
LAV3214	Heterocephalus	ansorgei	Ethiopia	Borena NP-Megady block	3.782	38.068	814	M	2017-05-21	SIEE (L. Lavrenchenko)	MK795886	Zemlemerova et al. 2020a	yes
LAV3411	Heterocephalus	glaber	Ethiopia	Jeldessa	9.762	42.282	1123	F	2019-04-02	SIEE (L. Lavrenchenko)	MN296102	Zemlemerova et al. 2020b	yes
LAV3452	Heterocephalus	glaber	Ethiopia	Jeldessa	9.738	42.258	1142	F	2019-04-04	SIEE (L. Lavrenchenko)	MN296104	Zemlemerova et al. 2020b	yes
LAV3455	Heterocephalus	glaber	Ethiopia	Jeldessa	9.738	42.258	1142	M	2019-04-04	SIEE (L. Lavrenchenko)	MT845379	Zemlemerova et al. 2021	yes
LAV3430	Heterocephalus	glaber	Ethiopia	Dire Dawa University campus	9.621	41.841	1145	M	2019-04-06	SIEE (L. Lavrenchenko)	MT845374	Zemlemerova et al. 2021	yes
LAV3434	Heterocephalus	glaber	Ethiopia	Dire Dawa University campus	9.621	41.838	1145	F	2019-04-06	SIEE (L. Lavrenchenko)	MT845376	Zemlemerova et al. 2021	yes
LAV3508	Heterocephalus	glaber	Ethiopia	Babile Elephant Sanctuary, Erer Medical Center	9.178	42.248	1304	F	2019-04-17	SIEE (L. Lavrenchenko)	MN296106	Zemlemerova et al. 2020b	yes
LAV3521	Heterocephalus	glaber	Ethiopia	Babile Elephant Sanctuary, Erer Medical Center	9.17	42.259	1282	F	2019-04-18	SIEE (L. Lavrenchenko)	MT845380	Zemlemerova et al. 2021	yes
LAV3527	Heterocephalus	glaber	Ethiopia	Babile Elephant Sanctuary, Erer Medical Center	9.171	42.261	1275	F	2019-04-18	SIEE (L. Lavrenchenko)	MN296109	Zemlemerova et al. 2020b	yes
ZMMU-S-111344	Heterocephalus	ansorgei	Somalia	Luuq	3.80842	42.5447	154		1974	Zoological Museum of Moscow University	xx	this study
U87521	Heterocephalus	ansorgei	Ethiopia	Dembalawachu	4.883	38.1	1868			GenBank	U87521	Faulkes et al. 1997
U87522	Heterocephalus	ansorgei	Kenya	Lerata	0.617	37.65	843			GenBank	U87522	Faulkes et al. 1997
U87523	Heterocephalus	ansorgei	Kenya	Lerata	0.617	37.65	843			GenBank	U87523	Faulkes et al. 1997
U87524	Heterocephalus	ansorgei	Kenya	Lerata	0.617	37.65	843			GenBank	U87524	Faulkes et al. 1997
RSA0004	Bathyergus	suillus-East	South Africa	Albertinia	-34.1968	21.4737						Šumbera et al. 2024		yes	PP975853	PP975841	PP975830	PP975875	PP975865
RSA0021	Bathyergus	suillus-janetta	South Africa	Kamierskroon	-30.2154	17.9535						Šumbera et al. 2024		yes	PP975858	PP975844	PP975835	PP975873	PP975862
RSA0017	Bathyergus	suillus-South	South Africa	Struisbaai	-34.7602	20.042						Šumbera et al. 2024		yes	PP975856	PP975842	PP975828	PP975874	PP975867
BS6	Bathyergus	suillus-West	South Africa	Darling	-33.38	18.38						Uhrová et al. 2022		yes	OK506505	OK506562	OK524036	OK524109	OK524145
CHH6	Cryptomys	hottentotus	South Africa	Darling	-33.377	18.3773						Uhrová et al. 2022		yes	OK506516	OK506563	OK524028	OK524122	OK524146
RSA0010	Cryptomys	mahali	South Africa	Struisbaai	-34.7188	19.9423						this study		yes	x	x	x	x	x
CHNR5	Cryptomys	natalensis	South Africa	Wakkerstroom	-27.2982	30.2694						this study		yes	x	x	x	x	x
QMUL175	Cryptomys	nimrodi	South Africa	Bulawayo	-20.15	28.6333						this study		yes	x	x	x	x	x
CHP10	Cryptomys	pretoriae	South Africa	Tygerpoort	-25.796	28.3547						this study		yes	x	x	x	x	x
ANG0196	Fukomys	bocagei	Angola	Tundavala	-14.8182	13.4123						Uhrová et al. 2022		yes	OK506519	OK506569	OK524033	OK524127	OK524150
VM156	Fukomys	damarensis	Zambia	Kalabo	-14.9976	22.6402						Uhrová et al. 2022		yes	OK506522	OK506565	OK524030	OK524124	OK524131
F01.2	Fukomys	foxi	Nigeria	Panyam	9.41044	9.21362						Uhrová et al. 2022		yes	OK506521	OK506570	OK524031	OK524123	OK524153
M8x298	Fukomys	sp. "Vyphia"	Malawi	Viphya Plateau	-11.8779	33.7917						Uhrová et al. 2022		yes	OK506517	OK506567	OK524034	OK524129	OK524149
Z7x08	Fukomys	mechowii	Zambia	Kapiri Mposhi	-13.9729	28.6699						Uhrová et al. 2022		yes	OK506520	OK506564	OK524035	OK524125	OK524151
JS014	Fukomys	micklemi	Zambia	Lusaka East FR	-15.4574	28.4243						Uhrová et al. 2022		yes	OK506523	OK506568	OK524032	OK524126	OK524148
RS0840	Fukomys	whytei	Zambia	Chilonga	-12.0253	31.3399						Uhrová et al. 2022		yes	OK506518	OK506566	OK524029	OK524128	OK524152
Nrd3	Georychus	capensis-KwaZuluNatal	South Africa	Nottingham Road	-29.4797	29.8633						Uhrová et al. 2022		yes	OK506506	OK506533		OK524108	OK524135
Wks1	Georychus	capensis-Mpumalanga	South Africa	Wakkerstroom	-27.2981	30.2626						Uhrová et al. 2022		yes	OK506502	OK506534	OK524037	OK524110	OK524132
CA2	Georychus	capensis-Cape	South Africa	Cape Town	-34.002	18.4827						Uhrová et al. 2022		yes	OK506511	OK506524	OK524043	OK524117	OK524137
CS5	Georychus	capensis-Struisbaai	South Africa	Struisbaai	-34.6861	19.999						Uhrová et al. 2022		yes	OK506512	OK506530	OK524046	OK524119	OK524140
CG14	Georychus	capensis-Oudshoorn	South Africa	Oudshoorn	-33.8493	22.0379						Uhrová et al. 2022		yes	OK506515	OK506529	OK524042	OK524116	OK524138
T8x404	Heliophobius	argenteocinereus-East	Tanzania	Msanga	-10.9025	39.2073						Uhrová et al. 2022		yes	OK506488	OK506550	OK524020	OK524086	OK524168
M8x3085	Heliophobius	argenteocinereus-West	Malawi	Mpalanganga estate	-15.4468	35.2607						Uhrová et al. 2022		yes	OK506499	OK506541	OK524010	OK524098	OK524162
T8x459	Heliophobius	kapiti	Tanzania	Nayala	-8.9384	33.1825						Uhrová et al. 2022		yes	OK506481	OK506555	OK524026	OK524105	OK524158
GCA004026965	Petromus	typicus										Zoonomia Consortium 2020		yes	GCA004026965	GCA004026965	GCA004026965
MOZ132	Thryonomys	gregorianus	Mozambique	Mt Mabu	-16.367	36.4134						Uhrová et al. 2022		yes	OK506477	OK506560	OK524003	OK524083	OK524130
GCA004025085	Thryonomys	swinderianus										Meredith et al. 2011; Visser et al. 2019; Ghana Grasscutter Project		yes	JN414974	MH186565	GCA004025085	GCA004025085
		References:
		Faulkes, C.G., Abbott, D.H., O'Brien, H.P., Lau, L., Roy, M.R., Wayne, R.K. and Bruford, M.W., 1997. Micro‐and macrogeographical genetic structure of colonies of naked mole‐rats Heterocephalus glaber. Molecular Ecology, 6: 615-628. https://doi.org/10.1046/j.1365-294x.1997.00227.x
		Meredith, R.W., Janečka, J.E., Gatesy, J., Ryder, O.A., Fisher, C.A., Teeling, E.C., Goodbla, A., Eizirik, E., Simão, T.L.L., Stadler, T., Rabosky, D.L., Honeycutt, R.L., Flynn, J.J., Ingram, C.M., Steiner, C., Williams, T.L., Robinson, T.J., Burk-Herrick, A., Westerman, M., Ayoub, N.A., Springer, M.S., Murphy W.J., 2011. Impacts of the Cretaceous Terrestrial Revolution and KPg extinction on mamm…
		Šumbera, R., Uhrová, M., Montoya-Sanhueza, G., Bryjová, A., Bennett, N.C., Mikula, O., 2024. Genetic diversity of the largest African mole-rat genus, Bathyergus. One, two or four species? Molecular Phylogenetics and Evolution, 199: 108157. https://doi.org/10.1016/j.ympev.2024.108157
		Uhrová, M., Mikula, O., Bennett, N.C., Van Daele, P., Piálek, L., Bryja, J., Visser, J.H., van Vuuren, B.J., Šumbera, R., 2022. Species limits and phylogeographic structure in two genera of solitary African mole-rats Georychus and Heliophobius. Molecular Phylogenetics and Evolution, 167: 107337. https://doi.org/10.1016/j.ympev.2021.107337.
		Visser, J.H., Bennett, N.C., Jansen van Vuuren, B., 2019. Evolutionary and ecological patterns within the South African Bathyergidae: implications for taxonomy. Molecular Phylogenetics and Evolution, 130: 181–197. https://doi.org/10.1016/j.ympev.2018.10.017.
		Zemlemerova, E.D., Kostin, D.S., Gromov, A.R., Martynov, A.A., Alexsandrov, D.Y. and Lavrenchenko, L.A., 2020a. Preliminary data on phylogeography of the naked mole-rat Heterocephalus glaber (Rodentia: Heterocephalidae). Russian Journal of Genetics, 56: 370-374. https://doi.org/10.1134/S1022795420030175
		Zemlemerova, E.D., Kostin, D.S. and Lavrenchenko, L.A., 2020b. Chromosomal Monomorphism in the Naked Mole-Rat Heterocephalus glaber (Rodentia: Heterocephalidae). Russian Journal of Genetics, 56: 992-995. https://doi.org/10.1134/S1022795420070157
		Zemlemerova, E.D., Kostin, D.S., Lebedev, V.S., Martynov, A.A., Gromov, A.R., Alexandrov, D.Y. and Lavrenchenko, L.A., 2021. Genetic diversity of the naked mole‐rat (Heterocephalus glaber). Journal of Zoological Systematics and Evolutionary Research, 59: 323-340. https://doi.org/10.1111/jzs.12423
		Zoonomia Consortium. 2020. A comparative genomics multitool for scientific discovery and conservation. Nature 587: 240–245 https://doi.org/10.1038/s41586-020-2876-6
